# Supplementary material for: Digital Clinical Communication for Families and Caregivers of Children or Young People With Short- or Long-Term Conditions: Rapid Review
Source: PubMed Central journal article supplement (PMC5775486; doi:10.2196/jmir.7999), 2018-01-05
Supplement: jmir_v20i1e5_app1.pdf [file jmir_v20i1e5_app1.pdf]

## Multimedia Appendix 1: Record of searches

### Record of main database searches for five of the six LYNC project rapid reviews

MEDLINE (Ovid) 1946 to August Week 3 2015, searched 27/08/2015

|    |                                                                                                                                                                                                                                     |        |
|----|-------------------------------------------------------------------------------------------------------------------------------------------------------------------------------------------------------------------------------------|--------|
| 1  | Electronic Mail/                                                                                                                                                                                                                    | 2038   |
| 2  | (email* or e-mail* or web-mail* or webmail* or internet-mail*).tw.                                                                                                                                                                  | 7666   |
| 3  | Text Messaging/                                                                                                                                                                                                                     | 887    |
| 4  | (text messag* or texting or multimedia message*).tw.                                                                                                                                                                                | 1263   |
| 5  | ((mobile phone* or cellular phone* or cell phone*) and (message* or text* or sms or mms)).tw.                                                                                                                                       | 819    |
| 6  | Social Media/                                                                                                                                                                                                                       | 1923   |
| 7  | (social media or social networking or blog* or facebook or myspace or twitter).tw.                                                                                                                                                  | 3505   |
| 8  | ((internet* or web* or information or patient or health) adj2 (portal* or forum)).tw.                                                                                                                                               | 1673   |
| 9  | (smartphone app* or smart phone app* or PDA app* or personal digital assistant app*).tw.                                                                                                                                            | 331    |
| 10 | (video-conferenc* or videoconferenc* or videophone* or video-phone* or Voice over Internet Protocol or VoIP or skype or (google adj2 (talk or hangouts))).tw.                                                                       | 1810   |
| 11 | Videoconferencing/                                                                                                                                                                                                                  | 923    |
| 12 | digital interactive television.tw.                                                                                                                                                                                                  | 5      |
| 13 | 1 or 2 or 3 or 4 or 5 or 6 or 7 or 8 or 9 or 10 or 11 or 12                                                                                                                                                                         | 17838  |
| 14 | (digital or electronic or virtual or computer* or software* or internet* or online or on-line or web* or multimedia or multi-media or communication technolog* or telecommunication* or ICT or network* technolog* or telemedic* or | 163183 |

|        |                                                                                                                                                                                                                                                                                                                                                                                                                                                                                                                                                                                                                                                                                                                                                                                                                                                                                                                                                                                                                                                                                                                                                          |             |
|--------|----------------------------------------------------------------------------------------------------------------------------------------------------------------------------------------------------------------------------------------------------------------------------------------------------------------------------------------------------------------------------------------------------------------------------------------------------------------------------------------------------------------------------------------------------------------------------------------------------------------------------------------------------------------------------------------------------------------------------------------------------------------------------------------------------------------------------------------------------------------------------------------------------------------------------------------------------------------------------------------------------------------------------------------------------------------------------------------------------------------------------------------------------------|-------------|
|        | telecare or telehealth* or telepsychiatr*).ti.                                                                                                                                                                                                                                                                                                                                                                                                                                                                                                                                                                                                                                                                                                                                                                                                                                                                                                                                                                                                                                                                                                           |             |
| 1<br>5 | *computer communication networks/ or *internet/                                                                                                                                                                                                                                                                                                                                                                                                                                                                                                                                                                                                                                                                                                                                                                                                                                                                                                                                                                                                                                                                                                          | 37023       |
| 1<br>6 | *telecommunications/ or *telemedicine/ or *remote consultation/ or<br>*telepathology/ or *teleradiology/ or *cell phones/ or *modems/ or *wireless<br>technology/                                                                                                                                                                                                                                                                                                                                                                                                                                                                                                                                                                                                                                                                                                                                                                                                                                                                                                                                                                                        | 22303       |
| 1<br>7 | 13 or 14 or 15 or 16                                                                                                                                                                                                                                                                                                                                                                                                                                                                                                                                                                                                                                                                                                                                                                                                                                                                                                                                                                                                                                                                                                                                     | 200778      |
| 1<br>8 | exp *Professional-Patient Relations/ or exp *Professional-Family Relations/                                                                                                                                                                                                                                                                                                                                                                                                                                                                                                                                                                                                                                                                                                                                                                                                                                                                                                                                                                                                                                                                              | 62797       |
| 1<br>9 | ((clinic* or center* or centre* or service* or hospital* or doctor* or physician*<br>or clinician* or nurse* or pharmacist* or health worker* or professional* or<br>provider* or practitioner* or therapist* or educator* or psychiatr* or patient*<br>or outpatient* or out-patient* or inpatient* or in-patient* or client* or child* or<br>teen* or paediatric* or pediatric* or boy* or girl* or youth* or schoolchild* or<br>adoles* or minor or minors or under age* or juvenile* or schoolage* or school<br>age* or young adult* or young person* or young people or student* or parent*<br>or mother* or father* or brother* or sister* or sibling* or family or families or<br>carer* or caregiver* or care giver*) adj4 (communicat* or relation* or interact*<br>or convers* or discuss* or message* or feedback or respond* or response* or<br>receive* or consult* or contact* or advice or advis* or counsel* or<br>recommend* or monitor* or review* or diary or diaries or assess* or support*<br>or educat* or train* or manage* or care or treat* or therapy or therapies or<br>intervention* or report* or ongoing partnership)).tw. | 261639<br>3 |
| 2<br>0 | 18 or 19                                                                                                                                                                                                                                                                                                                                                                                                                                                                                                                                                                                                                                                                                                                                                                                                                                                                                                                                                                                                                                                                                                                                                 | 265207<br>1 |
| 2<br>1 | 17 and 20                                                                                                                                                                                                                                                                                                                                                                                                                                                                                                                                                                                                                                                                                                                                                                                                                                                                                                                                                                                                                                                                                                                                                | 41890       |
| 2<br>2 | Young Adult/ or Adolescent/ or Child/ or Students/                                                                                                                                                                                                                                                                                                                                                                                                                                                                                                                                                                                                                                                                                                                                                                                                                                                                                                                                                                                                                                                                                                       | 256979<br>2 |

|        |                                                                                                                                                                                                                                                                                                                                                                                                                                                               |             |
|--------|---------------------------------------------------------------------------------------------------------------------------------------------------------------------------------------------------------------------------------------------------------------------------------------------------------------------------------------------------------------------------------------------------------------------------------------------------------------|-------------|
| 2<br>3 | (child* or teen* or paediatric* or pediatric* or boy* or girl* or youth* or schoolchild* or school child* or kid* or adoles* or minor or minors or under age* or juvenile* or pubescen* or secondary school* or highschool* or high school* or peer group* or schoolage* or school age* or young adult* or young person* or young people or student* or sixth form* or higher education or further education or undergraduate* or college* or universit*).tw. | 221790<br>2 |
| 2<br>4 | 22 or 23                                                                                                                                                                                                                                                                                                                                                                                                                                                      | 375105<br>6 |
| 2<br>5 | 21 and 24                                                                                                                                                                                                                                                                                                                                                                                                                                                     | 15042       |

MEDLINE In-Process & Other Non-Indexed Citations (Ovid) September 02, 2015, searched 03/09/2015

|        |                                                                                                                                                               |      |
|--------|---------------------------------------------------------------------------------------------------------------------------------------------------------------|------|
| 1      | Electronic Mail/                                                                                                                                              | 0    |
| 2      | (email* or e-mail* or web-mail* or webmail* or internet-mail*).tw.                                                                                            | 1509 |
| 3      | Text Messaging/                                                                                                                                               | 0    |
| 4      | (text messag* or texting or multimedia message*).tw.                                                                                                          | 457  |
| 5      | ((mobile phone* or cellular phone* or cell phone*) and (message* or text* or sms or mms)).tw.                                                                 | 257  |
| 6      | Social Media/                                                                                                                                                 | 0    |
| 7      | (social media or social networking or blog* or facebook or myspace or twitter).tw.                                                                            | 1327 |
| 8      | ((internet* or web* or information or patient or health) adj2 (portal* or forum)).tw.                                                                         | 306  |
| 9      | (smartphone app* or smart phone app* or PDA app* or personal digital assistant app*).tw.                                                                      | 222  |
| 1<br>0 | (video-conferenc* or videoconferenc* or videophone* or video-phone* or Voice over Internet Protocol or VoIP or skype or (google adj2 (talk or hangouts))).tw. | 240  |

|        |                                                                                                                                                                                                                                                                                                                                                                                                                                                                                                                                                                                                                                                                                                                                                                                                                                                                                                                                                                                                                                                                                                                   |            |
|--------|-------------------------------------------------------------------------------------------------------------------------------------------------------------------------------------------------------------------------------------------------------------------------------------------------------------------------------------------------------------------------------------------------------------------------------------------------------------------------------------------------------------------------------------------------------------------------------------------------------------------------------------------------------------------------------------------------------------------------------------------------------------------------------------------------------------------------------------------------------------------------------------------------------------------------------------------------------------------------------------------------------------------------------------------------------------------------------------------------------------------|------------|
| 11     | Videoconferencing/                                                                                                                                                                                                                                                                                                                                                                                                                                                                                                                                                                                                                                                                                                                                                                                                                                                                                                                                                                                                                                                                                                | 0          |
| 1<br>2 | digital interactive television.tw.                                                                                                                                                                                                                                                                                                                                                                                                                                                                                                                                                                                                                                                                                                                                                                                                                                                                                                                                                                                                                                                                                | 1          |
| 1<br>3 | 2 or 4 or 5 or 7 or 8 or 9 or 10 or 12                                                                                                                                                                                                                                                                                                                                                                                                                                                                                                                                                                                                                                                                                                                                                                                                                                                                                                                                                                                                                                                                            | 3888       |
| 1<br>4 | (digital or electronic or virtual or computer* or software* or internet* or online or on-line or web* or multimedia or multi-media or communication technolog* or telecommunication* or ICT or network* technolog* or telemedic* or telecare or telehealth* or telepsychiatr*).ti.                                                                                                                                                                                                                                                                                                                                                                                                                                                                                                                                                                                                                                                                                                                                                                                                                                | 27501      |
| 1<br>5 | 13 or 14                                                                                                                                                                                                                                                                                                                                                                                                                                                                                                                                                                                                                                                                                                                                                                                                                                                                                                                                                                                                                                                                                                          | 30742      |
| 1<br>6 | ((clinic* or center* or centre* or service* or hospital* or doctor* or physician* or clinician* or nurse* or pharmacist* or health worker* or professional* or provider* or practitioner* or therapist* or educator* or psychiatr* or patient* or outpatient* or out-patient* or inpatient* or in-patient* or client* or child* or teen* or paediatric* or pediatric* or boy* or girl* or youth* or schoolchild* or adoles* or minor or minors or under age* or juvenile* or schoolage* or school age* or young adult* or young person* or young people or student* or parent* or mother* or father* or brother* or sister* or sibling* or family or families or carer* or caregiver* or care giver*) adj4 (communicat* or relation* or interact* or convers* or discuss* or message* or feedback or respond* or response* or receive* or consult* or contact* or advice or advis* or counsel* or recommend* or monitor* or review* or diary or diaries or assess* or support* or educat* or train* or manage* or care or treat* or therapy or therapies or intervention* or report* or ongoing partnership)).tw. | 25236<br>9 |
| 1<br>7 | 15 and 16                                                                                                                                                                                                                                                                                                                                                                                                                                                                                                                                                                                                                                                                                                                                                                                                                                                                                                                                                                                                                                                                                                         | 5700       |
| 1<br>8 | (child* or teen* or paediatric* or pediatric* or boy* or girl* or youth* or schoolchild* or school child* or kid* or adoles* or minor or minors or under age* or juvenile* or pubescen* or secondary school* or highschool* or high school* or peer group* or schoolage* or school age* or young adult* or young person* or young people or student* or sixth form* or higher education or further education or undergraduate* or college* or universit*).tw.                                                                                                                                                                                                                                                                                                                                                                                                                                                                                                                                                                                                                                                     | 19189<br>3 |
| 1<br>9 | 17 and 18                                                                                                                                                                                                                                                                                                                                                                                                                                                                                                                                                                                                                                                                                                                                                                                                                                                                                                                                                                                                                                                                                                         | 1938       |

Embase (Ovid) 1974 to 2015 Week 35, searched 02/09/2015

|    |                                                                                                                                                                                                                                     |        |
|----|-------------------------------------------------------------------------------------------------------------------------------------------------------------------------------------------------------------------------------------|--------|
| 1  | *e-mail/                                                                                                                                                                                                                            | 1150   |
| 2  | (email* or e-mail* or web-mail* or webmail* or internet-mail*).tw.                                                                                                                                                                  | 18033  |
| 3  | *text messaging/                                                                                                                                                                                                                    | 780    |
| 4  | (text messag* or texting or multimedia message*).tw.                                                                                                                                                                                | 2242   |
| 5  | ((mobile phone* or cellular phone* or cell phone*) and (message* or text* or sms or mms)).tw.                                                                                                                                       | 1469   |
| 6  | *social media/                                                                                                                                                                                                                      | 2002   |
| 7  | (social media or social networking or blog* or facebook or myspace or twitter).tw.                                                                                                                                                  | 6596   |
| 8  | ((internet* or web* or information or patient or health) adj2 (portal* or forum)).tw.                                                                                                                                               | 2702   |
| 9  | (smartphone app* or smart phone app* or PDA app* or personal digital assistant app*).tw.                                                                                                                                            | 866    |
| 10 | (video-conferenc* or videoconferenc* or videophone* or video-phone* or Voice over Internet Protocol or VoIP or skype or (google adj2 (talk or hangouts))).tw.                                                                       | 2742   |
| 11 | *videoconferencing/                                                                                                                                                                                                                 | 576    |
| 12 | digital interactive television.tw.                                                                                                                                                                                                  | 7      |
| 13 | 1 or 2 or 3 or 4 or 5 or 6 or 7 or 8 or 9 or 10 or 11 or 12                                                                                                                                                                         | 33230  |
| 14 | (digital or electronic or virtual or computer* or software* or internet* or online or on-line or web* or multimedia or multi-media or communication technolog* or telecommunication* or ICT or network* technolog* or telemedic* or | 219504 |

|        |                                                                                                                                                                                                                                                                                                                                                                                                                                                                                                                                                                                                                                                                                                                                                                                                                                                                                                                                                                                                                                                                                                                   |             |
|--------|-------------------------------------------------------------------------------------------------------------------------------------------------------------------------------------------------------------------------------------------------------------------------------------------------------------------------------------------------------------------------------------------------------------------------------------------------------------------------------------------------------------------------------------------------------------------------------------------------------------------------------------------------------------------------------------------------------------------------------------------------------------------------------------------------------------------------------------------------------------------------------------------------------------------------------------------------------------------------------------------------------------------------------------------------------------------------------------------------------------------|-------------|
|        | telecare or telehealth* or telepsychiatr*).ti.                                                                                                                                                                                                                                                                                                                                                                                                                                                                                                                                                                                                                                                                                                                                                                                                                                                                                                                                                                                                                                                                    |             |
| 1<br>5 | *computer network/ or *internet/                                                                                                                                                                                                                                                                                                                                                                                                                                                                                                                                                                                                                                                                                                                                                                                                                                                                                                                                                                                                                                                                                  | 34588       |
| 1<br>6 | exp *telehealth/ or *teleconsultation/ or *mobile phone/                                                                                                                                                                                                                                                                                                                                                                                                                                                                                                                                                                                                                                                                                                                                                                                                                                                                                                                                                                                                                                                          | 18931       |
| 1<br>7 | 13 or 14 or 15 or 16                                                                                                                                                                                                                                                                                                                                                                                                                                                                                                                                                                                                                                                                                                                                                                                                                                                                                                                                                                                                                                                                                              | 267290      |
| 1<br>8 | *doctor patient relation/ or *nurse patient relationship/                                                                                                                                                                                                                                                                                                                                                                                                                                                                                                                                                                                                                                                                                                                                                                                                                                                                                                                                                                                                                                                         | 47263       |
| 1<br>9 | ((clinic* or center* or centre* or service* or hospital* or doctor* or physician* or clinician* or nurse* or pharmacist* or health worker* or professional* or provider* or practitioner* or therapist* or educator* or psychiatr* or patient* or outpatient* or out-patient* or inpatient* or in-patient* or client* or child* or teen* or paediatric* or pediatric* or boy* or girl* or youth* or schoolchild* or adoles* or minor or minors or under age* or juvenile* or schoolage* or school age* or young adult* or young person* or young people or student* or parent* or mother* or father* or brother* or sister* or sibling* or family or families or carer* or caregiver* or care giver*) adj4 (communicat* or relation* or interact* or convers* or discuss* or message* or feedback or respond* or response* or receive* or consult* or contact* or advice or advis* or counsel* or recommend* or monitor* or review* or diary or diaries or assess* or support* or educat* or train* or manage* or care or treat* or therapy or therapies or intervention* or report* or ongoing partnership)).tw. | 390537<br>0 |
| 2<br>0 | 18 or 19                                                                                                                                                                                                                                                                                                                                                                                                                                                                                                                                                                                                                                                                                                                                                                                                                                                                                                                                                                                                                                                                                                          | 393350<br>5 |
| 2<br>1 | 17 and 20                                                                                                                                                                                                                                                                                                                                                                                                                                                                                                                                                                                                                                                                                                                                                                                                                                                                                                                                                                                                                                                                                                         | 63407       |
| 2<br>2 | exp student/                                                                                                                                                                                                                                                                                                                                                                                                                                                                                                                                                                                                                                                                                                                                                                                                                                                                                                                                                                                                                                                                                                      | 91612       |
| 2<br>3 | (child* or teen* or paediatric* or pediatric* or boy* or girl* or youth* or schoolchild* or school child* or kid* or adoles* or minor or minors or under age* or juvenile* or pubescen* or secondary school* or highschool* or high school* or peer group* or schoolage* or school age* or young adult* or young person* or young people or student* or sixth form* or higher education or further education or undergraduate* or college* or universit*).tw.                                                                                                                                                                                                                                                                                                                                                                                                                                                                                                                                                                                                                                                     | 318853<br>0 |

|        |                                                                                                      |             |
|--------|------------------------------------------------------------------------------------------------------|-------------|
| 2<br>4 | limit 21 to (child <unspecified age> or school child <7 to 12 years> or adolescent <13 to 17 years>) | 8020        |
| 2<br>5 | 22 or 23                                                                                             | 320541<br>6 |
| 2<br>6 | 21 and 25                                                                                            | 20498       |
| 2<br>7 | 24 or 26                                                                                             | 22140       |

Cochrane Library (Wiley), searched 02/09/2015

|     |                                                                                                                                                                                                                                                                                             |       |
|-----|---------------------------------------------------------------------------------------------------------------------------------------------------------------------------------------------------------------------------------------------------------------------------------------------|-------|
| #1  | MeSH descriptor: [Electronic Mail] this term only                                                                                                                                                                                                                                           | 208   |
| #2  | (email* or e-mail* or webmail* or web-mail* or internet-mail*):ti,ab,kw                                                                                                                                                                                                                     | 1042  |
| #3  | MeSH descriptor: [Text Messaging] this term only                                                                                                                                                                                                                                            | 161   |
| #4  | (text next messag* or texting or multimedia next message*):ti,ab,kw                                                                                                                                                                                                                         | 529   |
| #5  | ((mobile next phone* or cellular next phone* or cell next phone*) and (message* or text* or sms or mms)):ti,ab,kw                                                                                                                                                                           | 334   |
| #6  | MeSH descriptor: [Social Media] this term only                                                                                                                                                                                                                                              | 26    |
| #7  | ("social media" or "social networking" or blog* or facebook or myspace or twitter):ti,ab,kw                                                                                                                                                                                                 | 190   |
| #8  | ((internet* or web* or information or patient or health) near/2 (portal* or forum)):ti,ab,kw                                                                                                                                                                                                | 110   |
| #9  | (smartphone next app* or "smart phone" next app* or PDA next app* or "personal digital assistant" next app*):ti,ab,kw                                                                                                                                                                       | 69    |
| #10 | (video-conferenc* or videoconferenc* or videophone* or video-phone* or "Voice over Internet Protocol" or VoIP or skype or (google near/2 (talk or hangouts))):ti,ab,kw                                                                                                                      | 318   |
| #11 | MeSH descriptor: [Videoconferencing] this term only                                                                                                                                                                                                                                         | 98    |
| #12 | "digital interactive television":ti,ab,kw                                                                                                                                                                                                                                                   | 1     |
| #13 | #1 or #2 or #3 or #4 or #5 or #6 or #7 or #8 or #9 or #10 or #11 or #12                                                                                                                                                                                                                     | 2260  |
| #14 | (digital or electronic or virtual or computer* or software* or internet* or online or on-line or web* or multimedia or multi-media or communication next technolog* or telecommunication* or ICT or network* next technolog* or telemedic* or telecare or telehealth* or telepsychiatr*):ti | 10980 |
| #15 | [mh ^"computer communication networks" [mjj]] or [mh ^internet [mjj]]                                                                                                                                                                                                                       | 1045  |
| #16 | [mh ^telecommunications [mjj]] or [mh ^telemedicine [mjj]] or [mh ^"remote consultation" [mjj]] or [mh ^telepathology [mjj]] or [mh ^teleradiology [mjj]] or [mh ^"cell phones" [mjj]] or [mh ^modems [mjj]] or [mh ^"wireless technology" [mjj]]                                           | 528   |
| #17 | #13 or #14 or #15 or #16                                                                                                                                                                                                                                                                    | 12873 |
| #18 | [mh "Professional-Patient Relations" [mjj]] or [mh "Professional-Family                                                                                                                                                                                                                     | 1808  |

|     | Relations" [mj]]                                                                                                                                                                                                                                                                                                                                                                                                                                                                                                                                                                                                                                                                                                                                                                                                                                                                                                                                                                                                                                                                                                                                                 |            |
|-----|------------------------------------------------------------------------------------------------------------------------------------------------------------------------------------------------------------------------------------------------------------------------------------------------------------------------------------------------------------------------------------------------------------------------------------------------------------------------------------------------------------------------------------------------------------------------------------------------------------------------------------------------------------------------------------------------------------------------------------------------------------------------------------------------------------------------------------------------------------------------------------------------------------------------------------------------------------------------------------------------------------------------------------------------------------------------------------------------------------------------------------------------------------------|------------|
| #19 | ((clinic* or center* or centre* or service* or hospital* or doctor* or physician* or clinician* or nurse* or pharmacist* or health next worker* or professional* or provider* or practitioner* or therapist* or educator* or psychiatr* or patient* or outpatient* or out-patient* or inpatient* or in-patient* or client* or child* or teen* or paediatric* or pediatric* or boy* or girl* or youth* or schoolchild* or adoles* or minor or minors or under next age* or juvenile* or schoolage* or school next age* or young next adult* or young next person* or young next people or student* or parent* or mother* or father* or brother* or sister* or sibling* or family or families or carer* or caregiver* or care next giver*) near/4 (communicat* or relation* or interact* or convers* or discuss* or message* or feedback or respond* or response* or receive* or consult* or contact* or advice or advis* or counsel* or recommend* or monitor* or review* or diary or diaries or assess* or support* or educat* or train* or manage* or care or treat* or therapy or therapies or intervention* or report* or ongoing next partnership)):ti,ab,kw | 34729<br>1 |
| #20 | #18 or #19                                                                                                                                                                                                                                                                                                                                                                                                                                                                                                                                                                                                                                                                                                                                                                                                                                                                                                                                                                                                                                                                                                                                                       | 34729<br>4 |
| #21 | #17 and #20                                                                                                                                                                                                                                                                                                                                                                                                                                                                                                                                                                                                                                                                                                                                                                                                                                                                                                                                                                                                                                                                                                                                                      | 6476       |
| #22 | [mh ^"Young Adult"] or [mh ^Adolescent] or [mh ^Child] or [mh ^Students]                                                                                                                                                                                                                                                                                                                                                                                                                                                                                                                                                                                                                                                                                                                                                                                                                                                                                                                                                                                                                                                                                         | 78701      |
| #23 | (child* or teen* or paediatric* or pediatric* or boy* or girl* or youth* or schoolchild* or school next child* or kid* or adoles* or minor or minors or under next age* or juvenile* or pubescen* or secondary next school* or highschool* or high next school* or peer next group* or schoolage* or school next age* or young next adult* or young next person* or young next people or student* or sixth next form* or higher next education or further next education or undergraduate* or college* or universit*):ti,ab,kw                                                                                                                                                                                                                                                                                                                                                                                                                                                                                                                                                                                                                                   | 23191<br>3 |
| #24 | #22 or #23                                                                                                                                                                                                                                                                                                                                                                                                                                                                                                                                                                                                                                                                                                                                                                                                                                                                                                                                                                                                                                                                                                                                                       | 23191<br>3 |
| #25 | #21 and #24                                                                                                                                                                                                                                                                                                                                                                                                                                                                                                                                                                                                                                                                                                                                                                                                                                                                                                                                                                                                                                                                                                                                                      | 2781       |

All Results (2781)

Cochrane Reviews (39)

Other Reviews (61)

Trials (2588)

Methods Studies (67)

Technology Assessments (6)



Economic Evaluations (20)

Cochrane Groups (0)

PsycINFO (Proquest), searched 08/09/2015

n.b. Results exported from line 24. Line S24 Limited to 2009 onwards due to Proquest restrictions on the number of records that can be exported. Unable to export results from line S21.

|     |                                                                                                                                                                                                                                                                                                                                                                                                                                                                                                                                                              |                            |
|-----|--------------------------------------------------------------------------------------------------------------------------------------------------------------------------------------------------------------------------------------------------------------------------------------------------------------------------------------------------------------------------------------------------------------------------------------------------------------------------------------------------------------------------------------------------------------|----------------------------|
| S24 | <a href="#">S17 AND S22</a><br>Limited by:<br>Publication date after 2009                                                                                                                                                                                                                                                                                                                                                                                                                                                                                    | 2,957*                     |
| S23 | <a href="#">S17 AND S22</a>                                                                                                                                                                                                                                                                                                                                                                                                                                                                                                                                  | <a href="#">4,707*</a>     |
| S22 | <a href="#">S18</a> Limits applied                                                                                                                                                                                                                                                                                                                                                                                                                                                                                                                           | <a href="#">188,824*</a>   |
| S21 | <a href="#">S19 AND S20</a>                                                                                                                                                                                                                                                                                                                                                                                                                                                                                                                                  | <a href="#">9,421*</a>     |
| S20 | <a href="#">TI,AB(child* OR teen* OR paediatric* OR pediatric* OR boy* OR girl* OR youth* OR schoolchild* OR school PRE/0 child* OR kid* OR adoles* OR minor OR minors OR under PRE/0 age* OR juvenile* OR pubescen* OR secondary PRE/0 school* OR highschool* OR high PRE/0 school* OR peer PRE/0 group* OR schoolage* OR school PRE/0 age* OR young PRE/0 adult* OR young PRE/0 person* OR young PRE/0 people OR student* OR sixth PRE/0 form* OR higher PRE/0 education OR further PRE/0 education OR undergraduate* OR college* OR universit*)</a>       | <a href="#">1,245,671*</a> |
| S19 | <a href="#">S17 AND S18</a>                                                                                                                                                                                                                                                                                                                                                                                                                                                                                                                                  | <a href="#">15,817*</a>    |
| S18 | <a href="#">TI,AB((clinic* OR center* OR centre* OR service* OR hospital* OR doctor* OR physician* OR clinician* OR nurse* OR pharmacist* OR health PRE/0 worker* OR professional* OR provider* OR practitioner* OR therapist* OR educator* OR psychiatr* OR patient* OR outpatient* OR out-patient* OR inpatient* OR in-patient* OR client* OR child* OR teen* OR paediatric* OR pediatric* OR boy* OR girl* OR youth* OR schoolchild* OR adoles* OR minor OR minors OR under PRE/0 age* OR juvenile* OR schoolage* OR school PRE/0 age* OR young PRE/0</a> | <a href="#">642,259*</a>   |

|     |                                                                                                                                                                                                                                                                                                                                                                                                                                                                                                                                                                                                                               |                |
|-----|-------------------------------------------------------------------------------------------------------------------------------------------------------------------------------------------------------------------------------------------------------------------------------------------------------------------------------------------------------------------------------------------------------------------------------------------------------------------------------------------------------------------------------------------------------------------------------------------------------------------------------|----------------|
|     | <u>adult* OR young PRE/0 person* OR young PRE/0 people OR student* OR parent* OR mother* OR father* OR brother* OR sister* OR sibling* OR family OR families OR carer* OR caregiver* OR care PRE/0 giver*) PRE/3 (communicat* OR relation* OR interact* OR convers* OR discuss* OR message* OR feedback OR respond* OR response* OR receive* OR consult* OR contact* OR advice OR advis* OR counsel* OR recommend* OR monitor* OR review* OR diary OR diaries OR assess* OR support* OR educat* OR train* OR manage* OR care OR treat* OR therapy OR therapies OR intervention* OR report* OR ongoing PRE/0 partnership))</u> |                |
| S17 | <u>S10 OR S11 OR S12 OR S13 OR S14 OR S15 OR S16</u>                                                                                                                                                                                                                                                                                                                                                                                                                                                                                                                                                                          | <u>84,172*</u> |
| S16 | <u>MJSUB.EXACT("Online Therapy")</u>                                                                                                                                                                                                                                                                                                                                                                                                                                                                                                                                                                                          | <u>1,492°</u>  |
| S15 | <u>MJSUB.EXACT("Telemedicine")</u>                                                                                                                                                                                                                                                                                                                                                                                                                                                                                                                                                                                            | <u>2,614°</u>  |
| S14 | <u>MJSUB.EXACT("Internet")</u>                                                                                                                                                                                                                                                                                                                                                                                                                                                                                                                                                                                                | <u>19,034*</u> |
| S13 | <u>MJSUB.EXACT("Cellular Phones")</u>                                                                                                                                                                                                                                                                                                                                                                                                                                                                                                                                                                                         | <u>2,003°</u>  |
| S12 | <u>MJSUB.EXACT("Websites")</u>                                                                                                                                                                                                                                                                                                                                                                                                                                                                                                                                                                                                | <u>2,602°</u>  |
| S11 | <u>TI(digital OR electronic OR virtual OR computer* OR software* OR internet* OR online OR on-line OR web* OR multimedia OR multi-media OR communication PRE/0 technolog* OR telecommunication* OR ICT OR network* PRE/0 technolog* OR telemedic* OR telecare OR telehealth* OR telepsychiatr*)</u>                                                                                                                                                                                                                                                                                                                           | <u>63,637*</u> |
| S10 | <u>S1 OR S2 OR S3 OR S4 OR S5 OR S6 OR S7 OR S8 OR S9</u>                                                                                                                                                                                                                                                                                                                                                                                                                                                                                                                                                                     | <u>22,147*</u> |
| S9  | <u>MJSUB.EXACT.EXPLODE("Electronic Communication")</u>                                                                                                                                                                                                                                                                                                                                                                                                                                                                                                                                                                        | <u>10,148*</u> |
| S8  | <u>TI,AB("digital interactive television")</u>                                                                                                                                                                                                                                                                                                                                                                                                                                                                                                                                                                                | <u>4°</u>      |
| S7  | <u>TI,AB(video-conferenc* OR videoconferenc* OR videophone* OR video-phone* OR "Voice over Internet Protocol" OR VoIP OR skype OR (google PRE/1 (talk OR hangouts)))</u>                                                                                                                                                                                                                                                                                                                                                                                                                                                      | <u>1,466°</u>  |
| S6  | <u>TI,AB((smartphone PRE/1 app* OR "smart phone" PRE/1 app* OR PDA PRE/1 app* OR "personal digital assistant" PRE/1 app*))</u>                                                                                                                                                                                                                                                                                                                                                                                                                                                                                                | <u>169°</u>    |
| S5  | <u>TI,AB((internet* OR web* OR information OR patient OR health) NEAR/1 (portal* OR forum))</u>                                                                                                                                                                                                                                                                                                                                                                                                                                                                                                                               | <u>745°</u>    |
| S4  | <u>TI,AB("social media" OR "social networking" OR blog* OR facebook OR myspace OR twitter)</u>                                                                                                                                                                                                                                                                                                                                                                                                                                                                                                                                | <u>7,850*</u>  |
| S3  | <u>TI,AB((mobile PRE/0 phone* OR cellular PRE/0 phone* OR cell PRE/0 phone*) AND (message* OR text* OR sms OR mms))</u>                                                                                                                                                                                                                                                                                                                                                                                                                                                                                                       | <u>766°</u>    |
| S2  | <u>TI,AB(text PRE/0 messag* OR texting OR multimedia PRE/0 message*)</u>                                                                                                                                                                                                                                                                                                                                                                                                                                                                                                                                                      | <u>1,342°</u>  |
| S1  | <u>TI,AB(email* OR e-mail* OR web-mail* OR webmail* OR internet-mail*)</u>                                                                                                                                                                                                                                                                                                                                                                                                                                                                                                                                                    | <u>6,408*</u>  |

## Record of searching and sorting within EndNote for this rapid review

### Families / Carers

In the EndNote Library of results from the above searches, we clicked on 'Rapid reviews main search > All' and in the search panel we selected 'Search Whole Group'

|    |             |          |             |
|----|-------------|----------|-------------|
|    | Title field | Contains | parent*     |
| Or | Title field | Contains | mother*     |
| Or | Title field | Contains | father*     |
| Or | Title field | Contains | sibling*    |
| Or | Title field | Contains | brother*    |
| Or | Title field | Contains | sister*     |
| Or | Title field | Contains | family      |
| Or | Title field | Contains | families    |
| Or | Title field | Contains | carer*      |
| Or | Title field | Contains | caregiver*  |
| Or | Title field | Contains | care-giver* |

Records from database searching (2009 onwards): 1146

Records from other sources: 10

Total: 1156
