# Supplementary material for: Digital Clinical Communication for Families and Caregivers of Children or Young People With Short- or Long-Term Conditions: Rapid Review
Source: PubMed Central journal article supplement (PMC5775486; doi:10.2196/jmir.7999), 2018-01-05
Supplement: jmir_v20i1e5_app2.pdf [file jmir_v20i1e5_app2.pdf]

## Multimedia Appendix 2. Characteristics of included studies.

| Study design, Author, Year                 | Country     | Participants                                                                           | Intervention using the digital clinical communication                                                                                | Control group                                                                                                   | Quality rating |
|--------------------------------------------|-------------|----------------------------------------------------------------------------------------|--------------------------------------------------------------------------------------------------------------------------------------|-----------------------------------------------------------------------------------------------------------------|----------------|
| Randomized controlled trials (RCTs) : n=10 |             |                                                                                        |                                                                                                                                      |                                                                                                                 |                |
| Bergmo et al. [10], 2009                   | Norway      | Parents of 98 children with atopic dermatitis                                          | Remote dermatology consultations                                                                                                     | Usual care                                                                                                      | Good           |
| Grover et al. [19], 2011                   | UK          | 64 carers of people with Anorexia Nervosa                                              | Carers participating in a web- based therapy sessions followed by email or phone support from a clinician                            | Usual care                                                                                                      | Poor           |
| Gund et al. [20], 2013                     | Sweden      | 34 families of preterm babies                                                          | A web application allowing families to communicate via a web messaging service- video conferences with nurses                        | Standard home health care (phone calls)                                                                         | Fair           |
| Hanberger et al. [21], 2013                | Sweden      | 474 families of children with type 1 diabetes                                          | A web- based portal allowing communication                                                                                           | Usual care (no access to the web-based portal)                                                                  | Good           |
| Looman et al. [22], 2015                   | USA         | 163 families of children with medical complexity receiving paediatric health care home | Access to an advanced practice registered nurse (APRN) care co-ordinator by telephone and video conferencing                         | Access to APRN by telephone only / Another control group who could contact the clinics general telephone number | Good           |
| Petranovich et al. [23], 2015              | USA         | 132 families of adolescents with traumatic brain injury (TBI)                          | A counsellor-assisted problem solving intervention (CAPS) where families completed online modules and participated in skype sessions | An internet resource comparison program (IRC)                                                                   | Fair           |
| Scharer et al. [24], 2009                  | USA         | 11 mothers/caregivers of children with serious mental illness                          | Web-based social support with a chat room                                                                                            | Telephone social support                                                                                        | Good           |
| Van Os-Medendorp et al. [25], 2012         | Netherlands | 90 parents of children with atopic dermatitis                                          | A web-portal which allowed e-consultations with a nurse                                                                              | Face-to-face care                                                                                               | Good           |

|                                        |             |                                                                                |                                                                                                                                       |                                                               |      |
|----------------------------------------|-------------|--------------------------------------------------------------------------------|---------------------------------------------------------------------------------------------------------------------------------------|---------------------------------------------------------------|------|
| Wade et al. [26], 2014                 | USA         | 132 families of adolescents with TBI                                           | A CAPS where families participated in online modules and skype sessions                                                               | An IRC program                                                | Fair |
| Wade et al. [27], 2012                 | USA         | 41 families of adolescents with TBI                                            | The Teen Online Problem Solving (TOPS) intervention (self-guided online modules and video conferencing)                               | An IRC program                                                | Fair |
| Controlled trial (non-randomised): n=2 |             |                                                                                |                                                                                                                                       |                                                               |      |
| Becker et al. [28], 2012               | USA         | 63 parents/carers of healthy children                                          | A parent advice line offered two nights per week with possibility to call or email the service                                        | Phone call                                                    | Fair |
| Bradford et al.[11], 2012              | Australia   | 14 parents of children referred to a Paediatric Palliative Care Service (PPCS) | Telehealth consultation in addition to usual care                                                                                     | Usual care (face to face care and PPCS nursing care services) | Fair |
| Pre/post uncontrolled study: n=7       |             |                                                                                |                                                                                                                                       |                                                               |      |
| Binford Hopf et al. [29], 2013         | USA         | 13 parents of 10 children with eating disorders                                | Group web-chat sessions with fellow parents and a clinical psychologist                                                               | /                                                             | Fair |
| Epstein et al. [30], 2015              | USA         | 26 parents of patients in the NICU                                             | Parents receiving daily Skype or FaceTime updates from staff                                                                          | /                                                             | Good |
| Gulmans et al. [31], 2012              | Netherlands | 30 parents of children with cerebral palsy                                     | A web based system for parent- professional communication and inter- professional communication                                       | /                                                             | Fair |
| Haney et al. [32], 2012                | USA         | 19 parents and carers of children various medical conditions                   | Emails for parents/ caregivers to communicate with nurses                                                                             | /                                                             | Fair |
| Vismara et al. [33], 2013              | USA         | Parents of 8 children with Autism spectrum disorder (ASD)                      | Video conferencing with a therapist and a website allowing parents to access text and video based learning modules and message boards | /                                                             | Fair |
| Vismara et al. [34], 2012              | USA         | Parents of 9 children with ASD                                                 | Video conferencing with a therapist and a parent intervention curriculum delivered by telehealth                                      | /                                                             | Fair |

|                                      |             |                                                                         |                                                                                                                             |                            |      |
|--------------------------------------|-------------|-------------------------------------------------------------------------|-----------------------------------------------------------------------------------------------------------------------------|----------------------------|------|
| Wade et al. [35], 2009               | USA         | Families of 9 children with TBI                                         | Video- conferencing and a website containing links to resources and self-guided session materials                           | /                          | Fair |
| Economic model: n=1                  |             |                                                                         |                                                                                                                             |                            |      |
| Bradford et al. [36], 2014           | Australia   | 95 home video paediatric palliative care consultations                  | Home video consultations (home telehealth program)                                                                          | Face to face consultations | Good |
| Cross-sectional & observational: n=9 |             |                                                                         |                                                                                                                             |                            |      |
| Braverman et al [37], 2011           | Russia      | 70 parents of children with kidney diseases                             | An educational website allowing parents to ask questions, upload documents and provide information                          | /                          | Fair |
| Byczkowski et al. [38], 2014         | USA         | 126 parents of children with various long term conditions               | Condition specific patient portals providing access to medical record elements and allowing secure messaging                | /                          | Fair |
| de Graaf et al. [39], 2013           | Netherlands | 128 carers of children with Infantile haemangioma                       | eHealth intervention including e-learning and e-consults with a dermatologist                                               | /                          | Fair |
| Hanlon-Dearman et al. [40], 2014     | Canada      | 16 families of children diagnosed with foetal alcohol spectrum disorder | Telehealth (diagnostic assessment and/or individual or group follow up)                                                     | /                          | Good |
| Hopper et al. [41], 2011             | Australia   | 10 carers of children referred to a genetics service                    | Video recorded consultations with a genetic counsellor with a live-feed of the session delivered to the clinical geneticist | /                          | Poor |
| Lee et al. [42], 2010                | USA         | 42 parents of infants with retinopathy of prematurity                   | Wide-field retinal imaging sent to a remote expert via telemedicine                                                         | /                          | Fair |
| Mulgrew et al. [43], 2011            | USA         | Parents of children with obesity                                        | Rural/remote clinic received telemedicine consultations with a paediatrician                                                | Face to face consultations | Fair |
| Nordfeldt et al. [44], 2010          | Sweden      | 19 parents of children with diabetes and 5 children with diabetes       | Portal providing diabetes information, blogs and message boards                                                             | /                          | Good |
| Wade et al. [45], 2009               | USA         | 9 families of children with TBI                                         | The TOPS intervention (self-guided online modules and video conferencing)                                                   | /                          | Fair |

|                              |          |                                                                   |                                                                                                                          |   |      |
|------------------------------|----------|-------------------------------------------------------------------|--------------------------------------------------------------------------------------------------------------------------|---|------|
| Interview studies:<br>n=2    |          |                                                                   |                                                                                                                          |   |      |
| Barlott et al. [46],<br>2015 | Columbia | 8 parents of people<br>with disabilities                          | SMS to receive<br>information, ask<br>questions and for social<br>interaction                                            | / | Fair |
| Britto et al. [47],<br>2013  | USA      | 24 parents of 25<br>children with various<br>long term conditions | Condition specific<br>patient portals providing<br>access to medical record<br>elements and allowing<br>secure messaging | / | Good |
